# Supplementary material for: Connecting Us Back to Ourselves: Aesthetic Experience as a Means to Growth after Trauma
Source: MDPI journal article supplement (doi:10.3390/socsci13010020), 2023-12-26
Supplement: s1 [file s1]

***Perinatal Dreaming & Understanding Country Workshops***  
**Structure of The Road Trip**

| <b>No:</b> | <b>Theme/Landscape (to which track is aligned)</b>                        |
|------------|---------------------------------------------------------------------------|
| 1.         | <b><i>Call to Adventure</i></b>                                           |
| 2.         | <b><i>Conception</i></b>                                                  |
| 3.         | <b>Good Womb:</b> Amniotic Universe; Indigenous concept of <i>Kanyini</i> |
| 4.         | <b>Oceanic:</b> Indigenous concept of <i>Dadirri</i>                      |
| 5.         | <b><i>Toxic Womb:</i></b> disconnection, Fear, dread, anxiety,            |
| 6.         | <b><i>Labour begins</i></b>                                               |
| 7.         | <b><i>Labour intensifies</i></b>                                          |
| 8.         | <b><i>Transition: birthing</i></b>                                        |
| 10.        | <b><i>Toxic Breast</i></b>                                                |
| 11.        | <b><i>Toxic Breast:</i></b> Abandonment/rejection.                        |
| 12.        | <b><i>Home</i></b>                                                        |
| 13.        | <b>Dadirri</b> – stillness.                                               |
| 14.        | <b>Natural landscape</b>                                                  |
